# Supplementary material for: Lipotoxicity disrupts incretin-regulated human β cell connectivity
Source: JCI journal article supplement (doi:10.1172/jci68459), 2013-09-09
Supplement: sd1 [file 1]

## SUPPLEMENTAL MATERIAL

**Supplemental Figure 1:** Fluo2-loaded islets and GLP-1 dose responses.

**Supplemental Figure 2:** Glucose- and GLP-1R-dependency of islet  $\text{Ca}^{2+}$  responses to incretin.

**Supplemental Figure 3:** Gap junction (GJ) blockade doesn't affect cell responses to depolarising stimuli.

**Supplemental Figure 4:** Silencing of gap junction (GJ) expression impairs coordinated cell responses to GLP-1.

**Supplemental Figure 5:** Palmitate reduces gap junction (GJ) protein expression.

**Supplemental Figure 6:** Palmitate impairs glucose-stimulated insulin secretion.

**Supplemental Figure 7:** Representative  $\text{Ca}^{2+}$  traces of control-, palmitate- and palmitate+H89-treated islets.

**Supplemental Figure 8:** Inhibition of PKA does not acutely affect  $\text{Ca}^{2+}$ -responses to incretin.

**Supplemental Figure 9:** Inter-individual variability does not alter deleterious effects of palmitate on coordinated cell-cell activity.

**Supplemental Figure 10:** *In vivo* validation of exendin4-FITC binding.

**Supplemental Figure 11:**  $\text{Ca}^{2+}$ -responses to carbachol and tolbutamide are unaffected by gap junction (GJ) blockade.

**Supplemental Figure 12:** Glucose tolerance, Cx36 expression and cell viability in high fat diet (HFD)-fed mice.

**Supplemental Figure 13:** Incubation of mouse islets with palmitate does not alter the fold-change of GLP-stimulated insulin secretion.

**Supplemental Figure 14:** Schematic depicting proposed mechanisms underlying GLP-1 effects on coordinated cell-cell activity.

**Supplemental Table 1:** Summary of donor age, gender, BMI and origin.

**Supplemental Table 2:** Primer sequences used for quantitative real-time polymerase chain reaction studies (qPCR).

**Supplemental Movie 1:** Timelapse recording of calcium responses to GLP-1 in a human islet.

**Supplemental Movie 2:** Timelapse recording of GLP-1-stimulated insulin release in BGA-treated islets using the  $\text{Zn}^{2+}$ -probe ZIMIR.

**Supplemental Movie 3:** Timelapse recording of GLP-1-stimulated insulin release in AGA-treated islets using the  $\text{Zn}^{2+}$ -probe ZIMIR.

**Supplemental Movie 4:** Timelapse recording of calcium responses to glucose and GLP-1 in a normal diet mouse islet.

**Supplemental Movie 5:** Timelapse recording of calcium responses to glucose and GLP-1 in a high fat diet mouse islet.

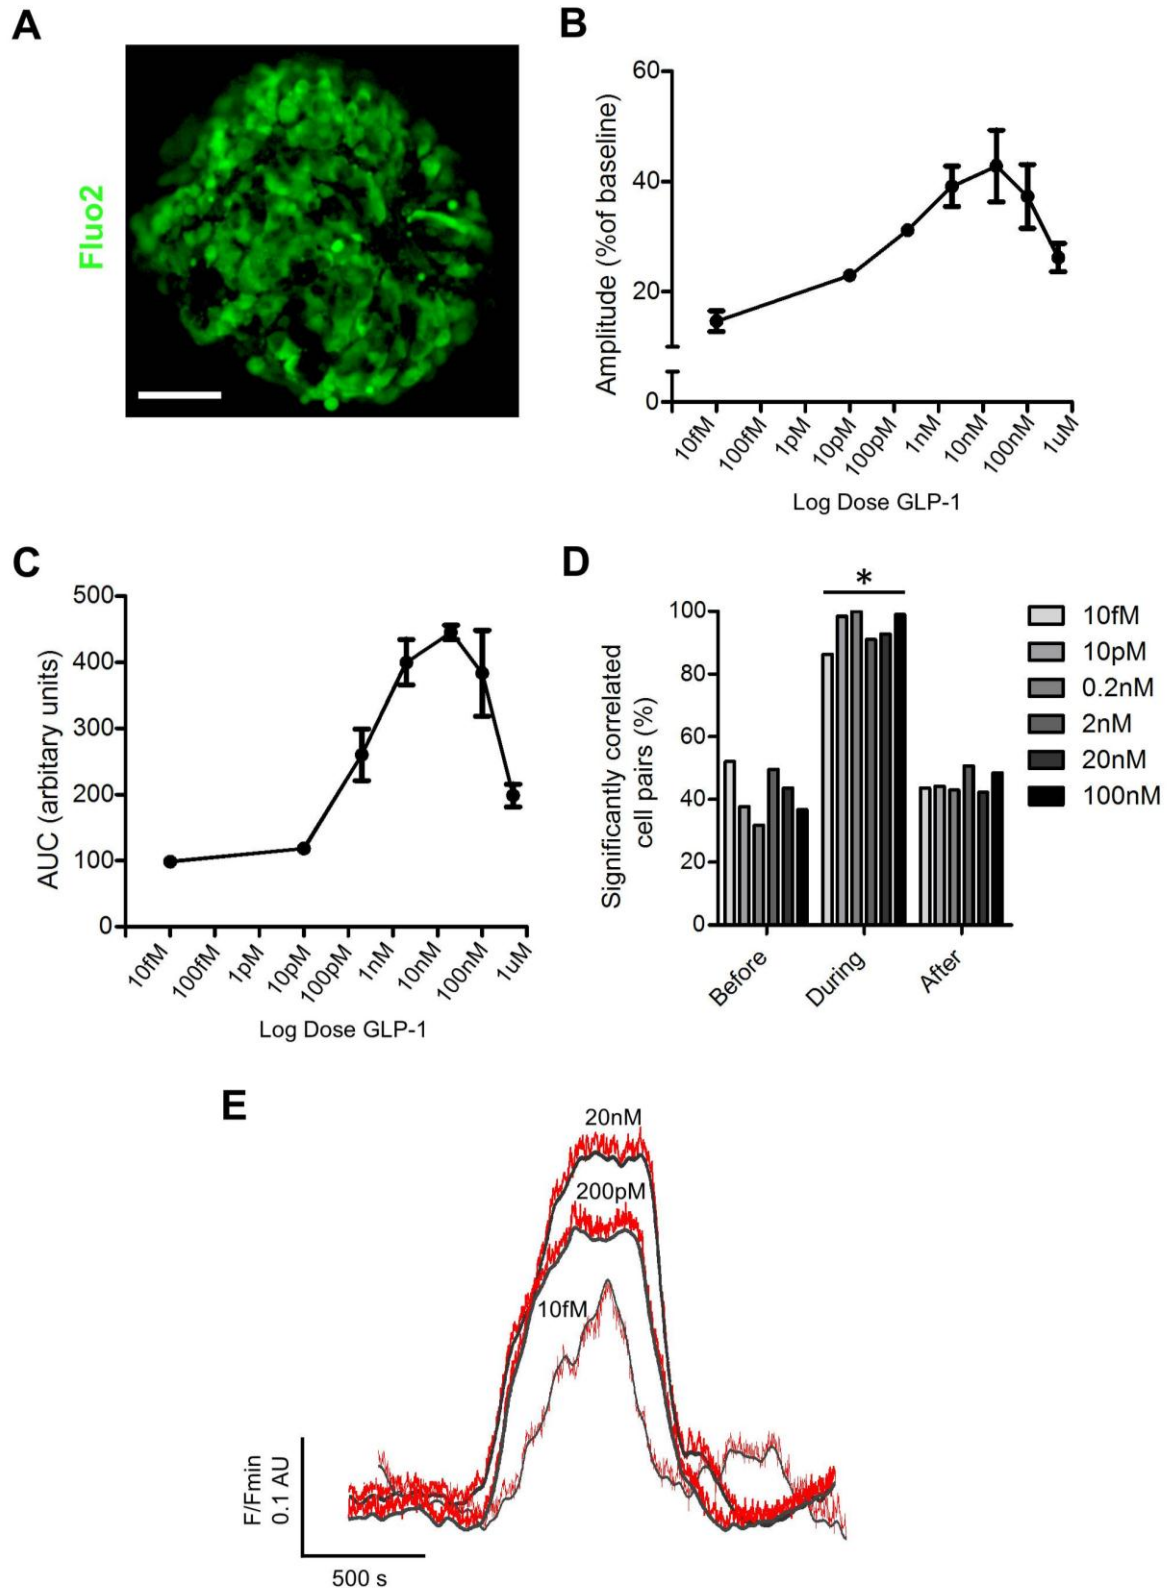

**Supplemental Figure 1: Fluo2-loaded islets and GLP-1 dose responses.** (A) Optical section through a fluo2-loaded human islet (scale bar, 40  $\mu$ m). (B) Dose-response (log scale) demonstrates maximal amplitude of  $\text{Ca}^{2+}$  rises following stimulation with 20 nM GLP-1 ( $n=3$  recordings). (C) As for (B) but area under the curve (AUC). (D) GLP-1 10 fM-100 nM stimulates identical and significant increases in correlated cell-cell behaviour (\* $P<0.05$  versus Before GLP-1 application, two-way ANOVA;  $n=3$  recordings). (E) Representative  $\text{Ca}^{2+}$ -responses to 10 fM, 200 pM and 20 nM GLP-1. Values represent mean  $\pm$  SEM.

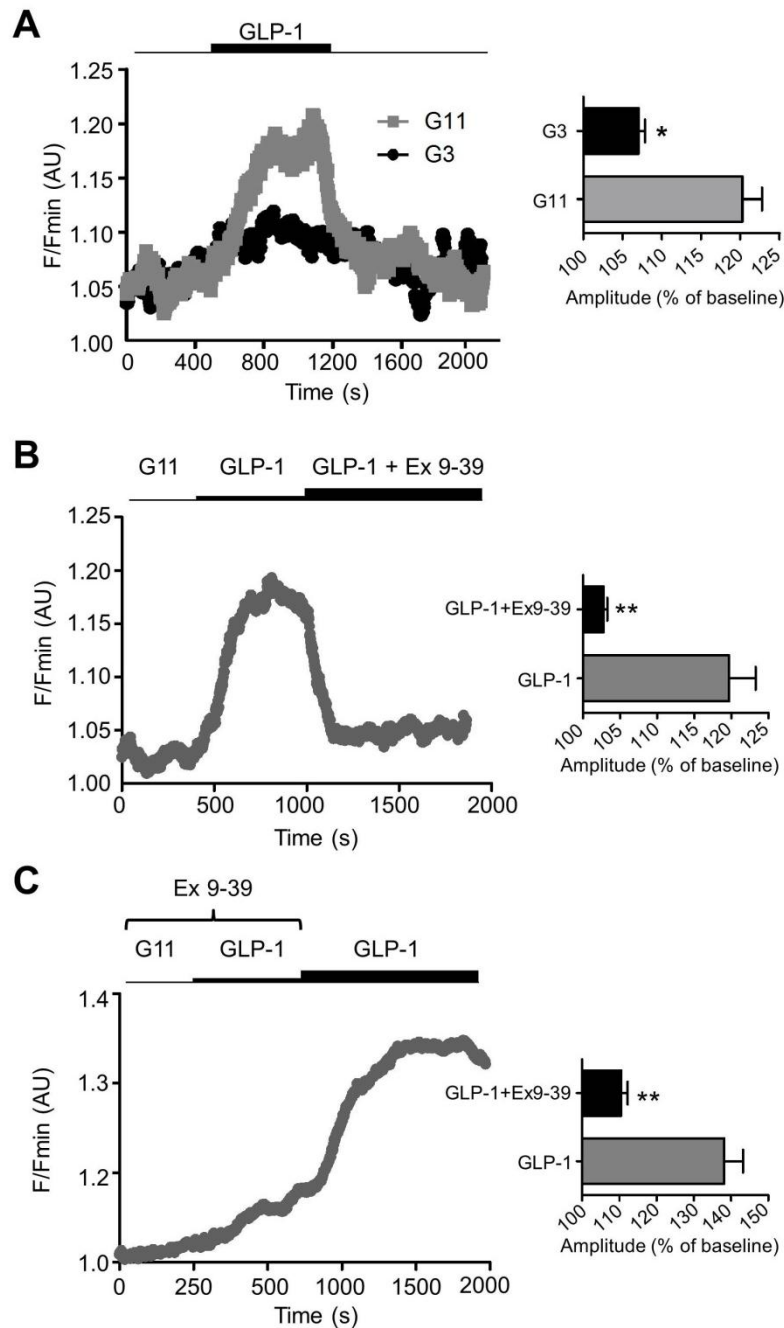

**Supplemental Figure 2:** Glucose- and GLP-1R-dependency of islet  $\text{Ca}^{2+}$ -responses to incretin. **(A)**  $\text{Ca}^{2+}$ -responses to GLP-1 are present at 11 mM but not 3 mM glucose (mean traces, left panel) (\* $P < 0.05$  versus G3, Mann-Whitney U-test;  $n = 4$ -5 recordings from three donors). **(B)** GLP-1-induced increases in  $[\text{Ca}^{2+}]_i$  are abrogated by post-application of 100 nM exendin 9-39 (Ex 9-39), a competitive GLP-1R antagonist (mean traces, left panel) (\*\* $P < 0.01$  versus GLP-1, Mann-Whitney U-test;  $n = 5$  recordings from three donors). **(C)** Pre-application of 100 nM Ex 9-39 reversibly prevents GLP-1 from evoking  $\text{Ca}^{2+}$ -rises (mean traces, left panel) (\*\* $P < 0.01$  versus GLP-1, Mann-Whitney U-test;  $n = 3$  recordings). Values represent mean  $\pm$  SEM.

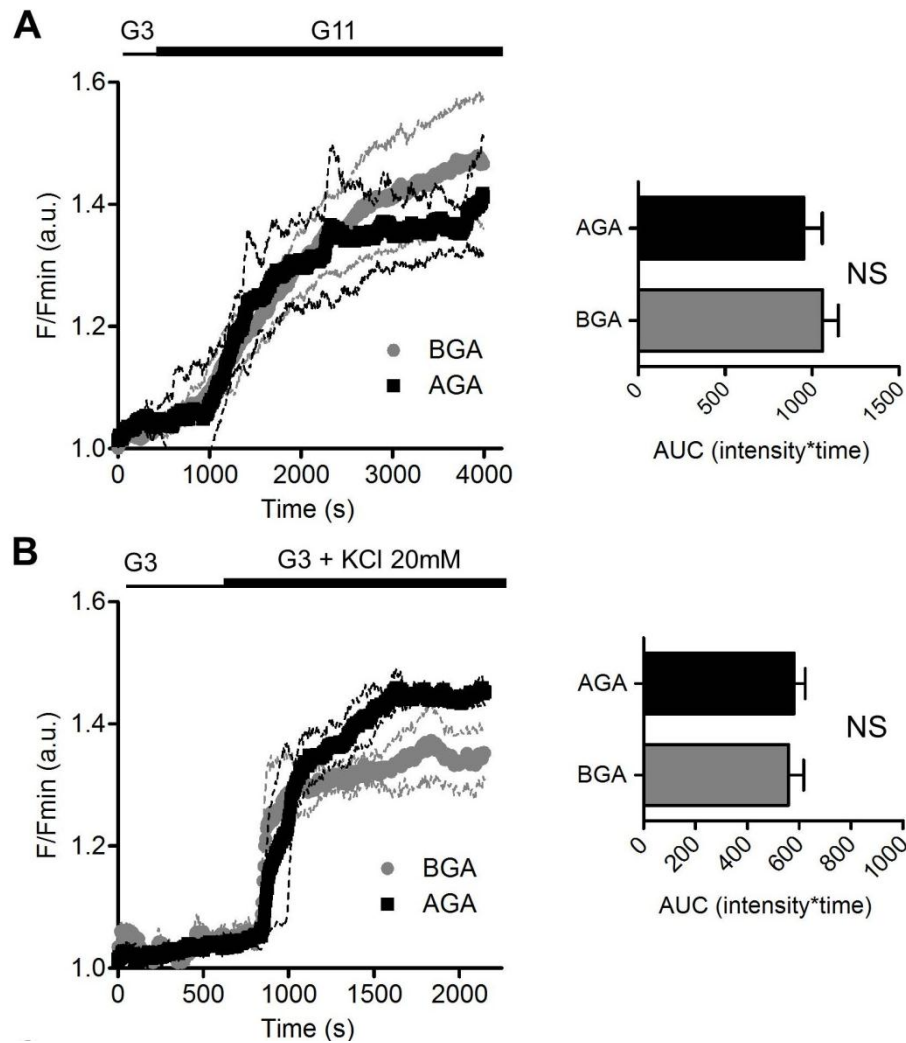

**Supplemental Figure 3:** Gap junction (GJ) blockade does not affect cell responses to depolarizing stimuli. **(A)** The GJ-blocker 18- $\alpha$  glycyrrhithinic acid (AGA) does not alter  $\text{Ca}^{2+}$  responses to 11 mM glucose (G11) *versus* its inactive analog,  $\beta$ -glycyrrhizic acid (BGA) (NS, non-significant *versus* control (Con); Mann-Whitney U-test) (mean traces  $\pm$  standard deviation (S.D); left panel;  $n=3$  recordings). **(B)** As for **(A)** but following application of the generic depolarizing stimulus, potassium chloride (KCl) ( $n=3$  recordings). Unless otherwise stated, values represent mean  $\pm$  SEM.

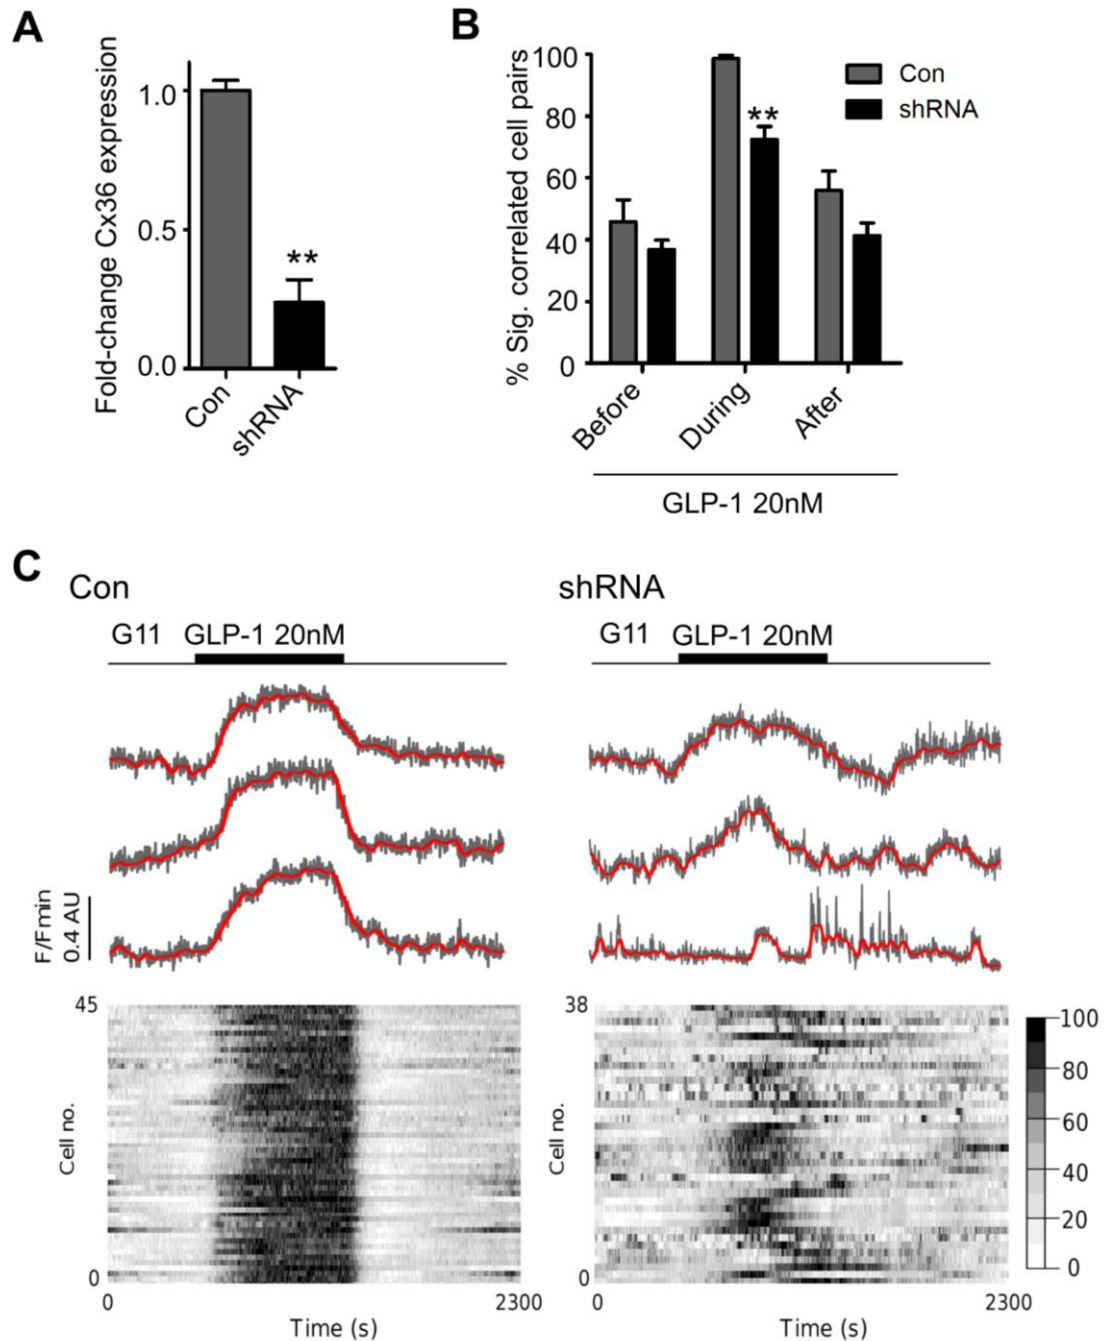

**Supplemental Figure 4:** Silencing of gap junction (GJ) expression impairs coordinated cell responses to GLP-1. **(A)** Cx36 short hairpin RNA (shRNA) reduces transcript levels in human islet cells (\*\* $P < 0.01$  *versus* control (Con), Student's t-test) ( $n = 3$  donors). **(B)** Cx36 knockdown impairs coordinated cell responses to GLP-1 (\*\* $P < 0.01$ , two-way ANOVA) ( $n = 10$  islets from three donors). **(C)** Representative  $\text{Ca}^{2+}$ -traces from control (Con)- and shRNA-treated islets. Top panel: red, smoothed; grey, raw. Bottom panel: heatmap depicting min-max for each cell as a 100-bit color ramp.

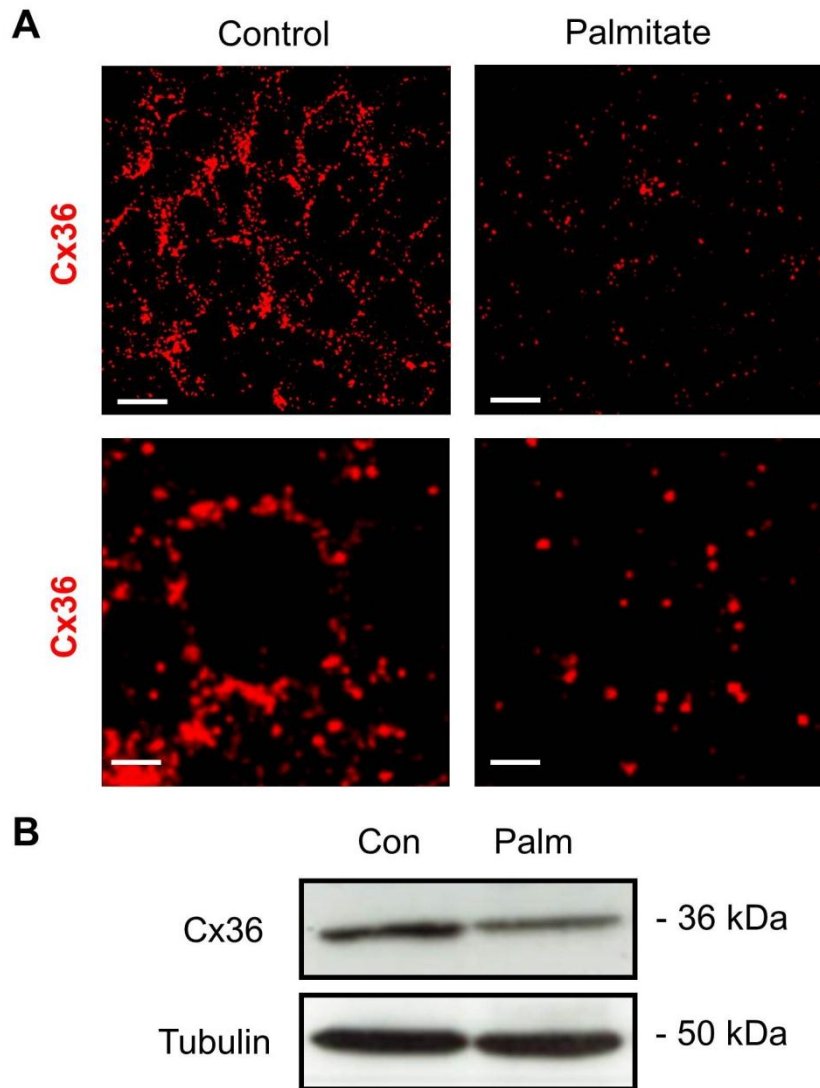

**Supplemental Figure 5:** Palmitate reduces gap junction (GJ) protein expression. **(A)** High resolution images of immunostained human islets reveals a decrease in connexin 36 (Cx36) immunopositivity following exposure to palmitate (magnified images; bottom panel; scale, 10  $\mu$ m top and 5 $\mu$ m bottom). **(B)** Western (immuno-) blotting using specific antibodies against Cx36 confirms the results from **(A)**. A representative blot is shown ( $n=3$  blots).

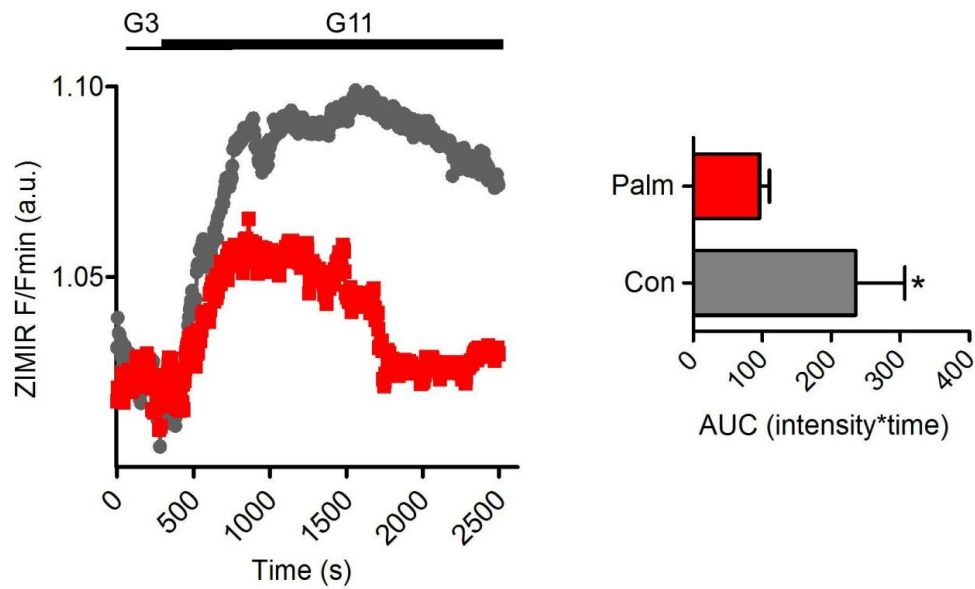

**Supplemental Figure 6:** Palmitate impairs glucose-stimulated insulin secretion. 72 h exposure to palmitate (Palm) alters the kinetics of 11 mM glucose (G11)-stimulated insulin secretion *versus* control (Con) islets (left). Bar graph displays the mean area under the curve (AUC) (right panel) (\* $P < 0.05$  *versus* control (Con); student's t-test;  $n = 5$  recordings). Values represent mean  $\pm$  SEM.



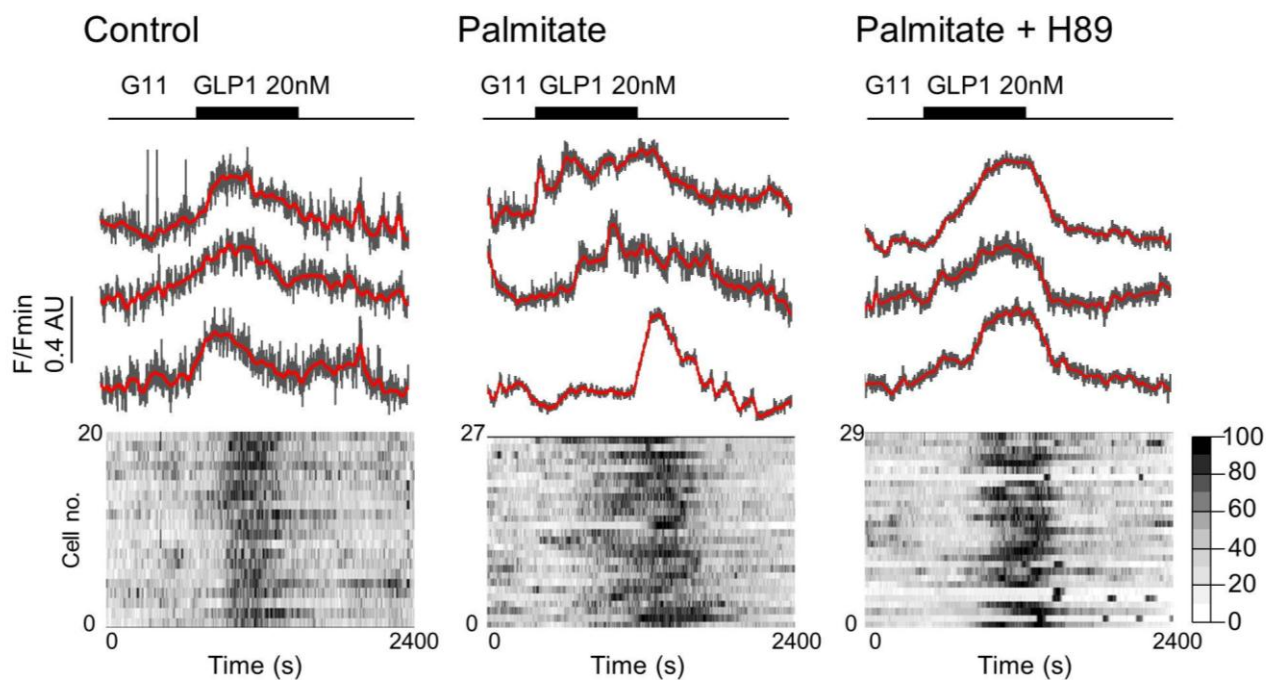

**Supplemental Figure 7:** Representative  $\text{Ca}^{2+}$  traces of control, palmitate and palmitate + H89 treated islets. Top panel: representative  $\text{Ca}^{2+}$  traces; red, smoothed; grey, raw. Bottom panel: heatmap depicting min-max for each cell as a 100-bit color ramp.



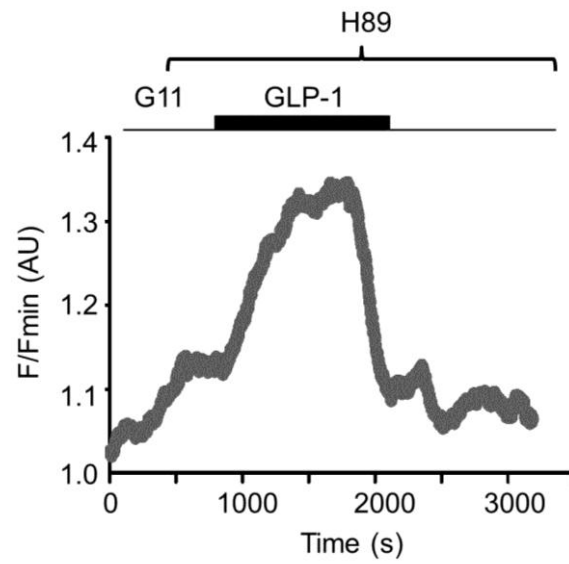

**Supplemental Figure 8:** Inhibition of PKA does not acutely affect  $\text{Ca}^{2+}$ -responses to incretin (mean trace of  $n=5$  recordings).

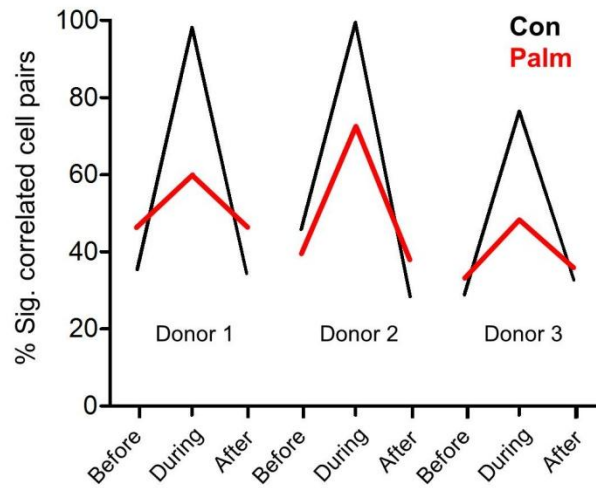

**Supplemental Figure 9:** Inter-individual variability does not alter deleterious effects of palmitate on coordinated cell-cell activity. Before-during-after plot demonstrates reduction in mean % significantly correlated cell pairs in palmitate- (Palm) *versus* control- (Con) treated islets obtained from three individual donors. Donors correspond to the isolations of 14<sup>th</sup> May, 16<sup>th</sup> May and 4<sup>th</sup> June 2012, see Supplemental Table 1.

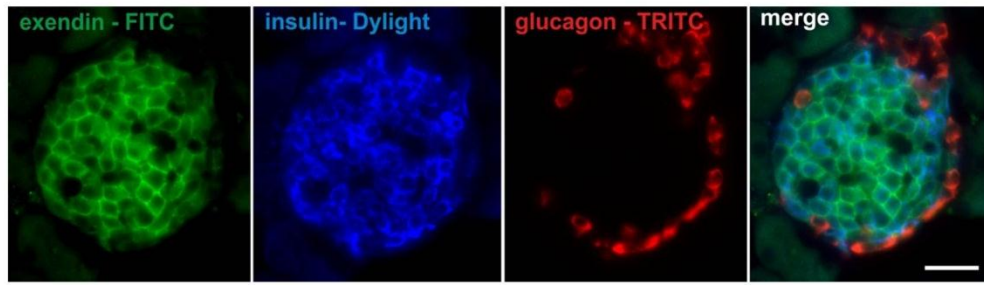

**Supplemental Figure 10:** *In vivo* validation of exendin4-FITC binding. One hour after the *in vivo* administration of exendin4-FITC to mice, a section of pancreas was immunostained for FITC (green), insulin (blue) and glucagon (red). In all islets, exendin4 was easily detected at the surface of virtually all beta- but less so in alpha-cells (scale bar, 40  $\mu$ m).

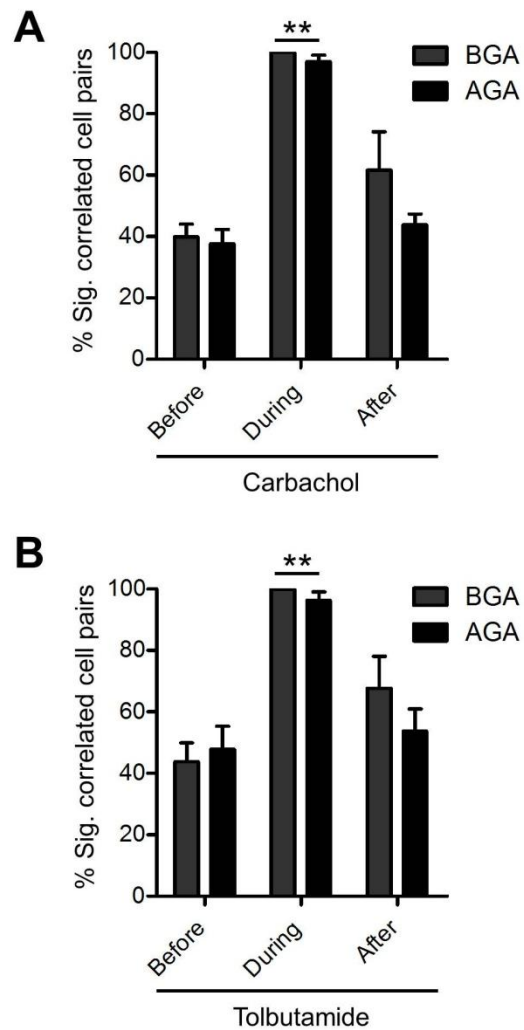

**Supplemental Figure 11:**  $\text{Ca}^{2+}$ -responses to carbachol and tolbutamide are unaffected by gap junction (GJ) blockade. (A)  $\beta$ -glycerrhizic (BGA; inactive analog) and 18- $\alpha$  glycerrhithinic acid (AGA; active analog) do not alter coordinated beta cell responses to the muscarinic agonist carbachol (10 $\mu\text{M}$ ) (\*\* $P < 0.01$  *versus* before carbachol application, Kruskal-Wallis test;  $n=4$  recordings). (B) As for B except following application of tolbutamide (100 $\mu\text{M}$ ) (\*\* $P < 0.01$  *versus* before tolbutamide application, Kruskal-Wallis test;  $n=4$  recordings). Values represent mean  $\pm$  SEM.

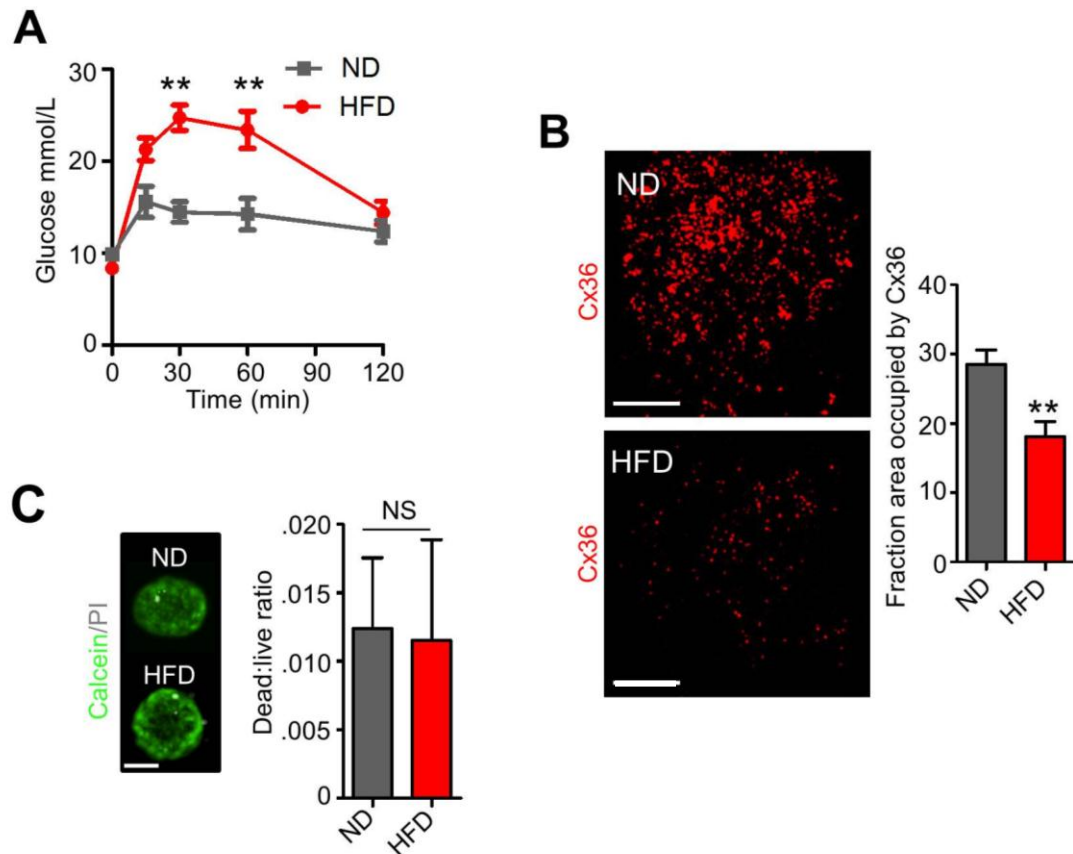

**Supplemental Figure 12:** Glucose tolerance, Cx36 expression and cell viability in high fat diet (HFD)-fed mice **(A)** Mice fed HFD for at least 15 weeks display glucose intolerance following intraperitoneal glucose tolerance test (IPGTT) *versus* their normal diet (ND) counterparts (\*\* $P < 0.01$  *versus* before; two-way ANOVA;  $n = 5-10$  animals). **(B)** Immunostaining of intact islets reveals a reduction in Cx36 expression in HFD-fed animals. Brightness and contrast have been linearly increased in both panels to improve visibility (scale bar = 10  $\mu\text{m}$ ). **(C)** HFD does not affect cell viability as assessed by the dead:live assay ( $n = 6$  islets from each state) (scale bar; 50  $\mu\text{m}$ ).

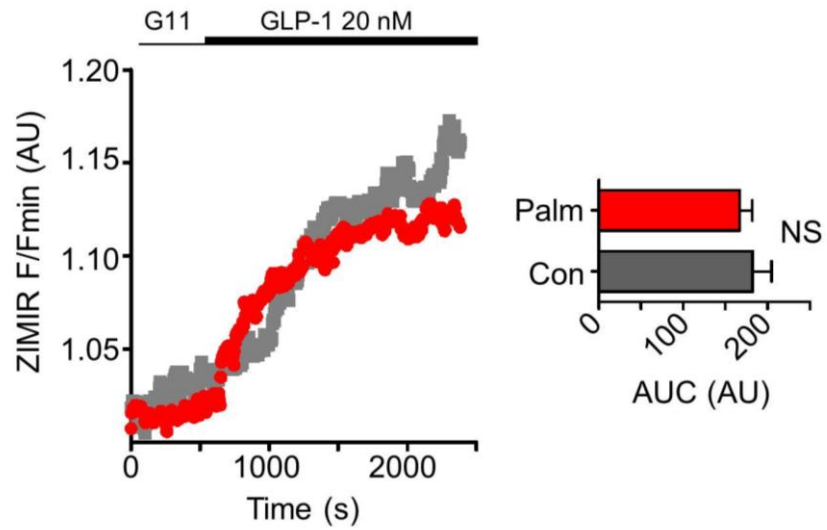

**Supplemental Figure 13:** Incubation of mouse islets with palmitate (Palm) does not alter the fold-change (left panel) or AUC (right panel) of GLP-stimulated insulin secretion as measured using ZIMIR (NS, non-significant *versus* control (Con); Mann-Whitney U-test;  $n=6-7$  islets from 4 animals).

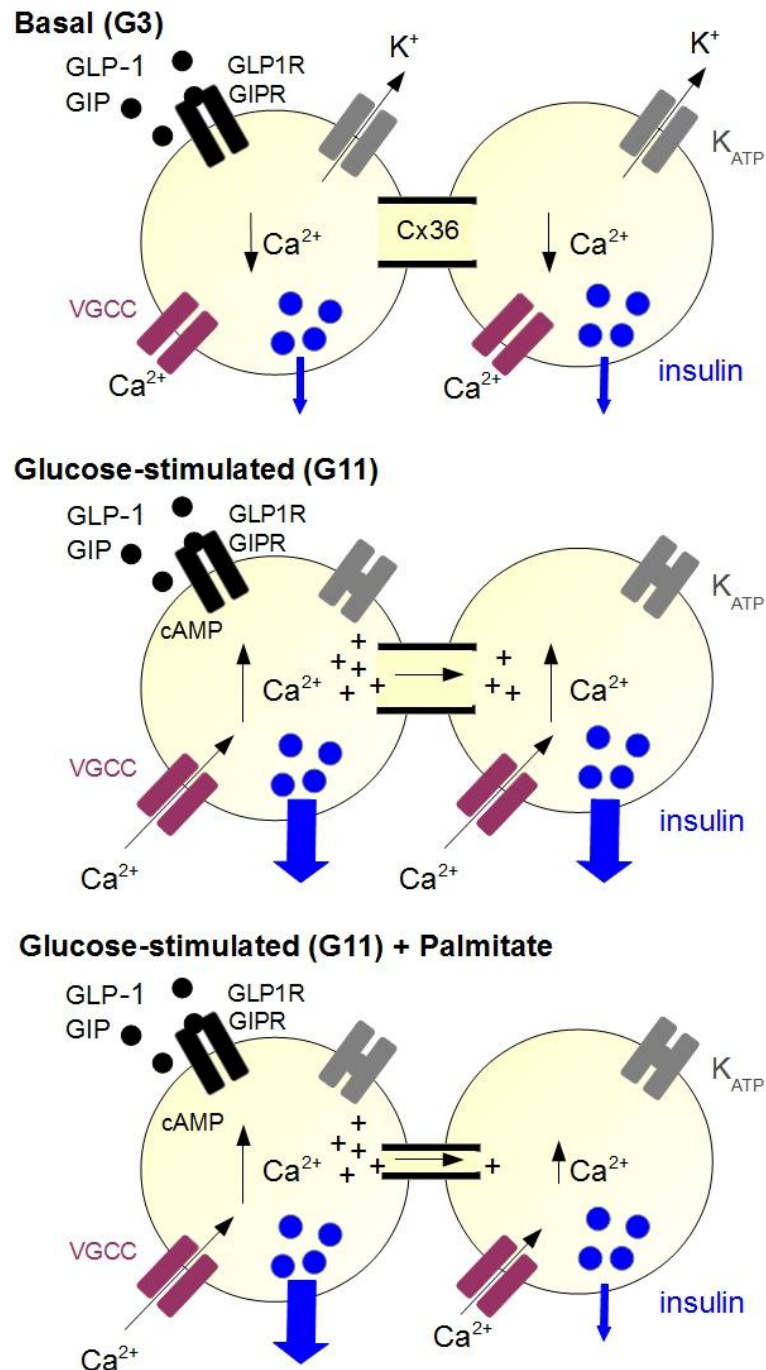

**Supplemental Figure 14:** Schematic depicting proposed mechanisms underlying GLP-1 and GIP effects on coordinated cell-cell activity. Under basal (normoglycemic) conditions, the incretins are unable to evoke rises in cytosolic free  $Ca^{2+}$ . At permissive glucose concentrations,  $K_{ATP}$  channels are closed and the incretins engage cAMP-dependent  $Ca^{2+}$  influx which entrains neighbouring cells via gap junctions (GJ) comprised of connexin 36. Incubation of islets with the free fatty acid (FFA) palmitate reduces GJ-signalling leading to asynchronous  $Ca^{2+}$  rises in response to GLP-1 or GIP due to impaired electrotonic coupling.



| Date         | Age (years) | Gender | BMI (kg/m <sup>2</sup> ) | Origin |
|--------------|-------------|--------|--------------------------|--------|
| 17 May 2013  | 75          | F      | 19.6                     | Pisa   |
| 7 May 2013   | 67          | F      | 22.8                     | Milan  |
| 3 May 2013   | 52          | M      | 24.8                     | Geneva |
| 24 Apr 2013  | 28          | F      | 20.2                     | Pisa   |
| 12 Apr 2013  | 51          | M      | 30                       | Oxford |
| 19 Mar 2013  | 51          | F      | 41                       | Oxford |
| 11 Jan 2013  | 67          | M      | 27.4                     | Geneva |
| 11 Dec 2012  | 76          | F      | 25.4                     | Pisa   |
| 27 Nov 2012  | 68          | M      | 27.5                     | Pisa   |
| 12 Nov 2012  | 52          | M      | 27                       | Geneva |
| 29 Oct 2012  | 46          | M      | 36                       | Oxford |
| 11 Oct 2012  | 49          | M      | 24.1                     | Geneva |
| 19 Sep 2012  | 79          | F      | 29.7                     | Pisa   |
| 06 Sep 2012  | 51          | M      | 26.2                     | Pisa   |
| 24 July 2012 | 20          | M      | 22.8                     | Geneva |
| 04 Jun 2012  | 43          | F      | 34.2                     | Geneva |
| 28 May 2012  | 80          | F      | 27.3                     | Pisa   |
| 16 May 2012  | 50          | F      | 20                       | Pisa   |
| 14 May 2012  | 57          | F      | 23                       | Oxford |
| 01 May 2012  | 46          | F      | 26                       | Oxford |
| 13 Feb 2012  | 56          | F      | 19.7                     | Geneva |

**Supplemental Table 1:** Summary of donor age, gender, BMI and origin.

| Gene                             | Forward Primer              | Reverse Primer                 |
|----------------------------------|-----------------------------|--------------------------------|
| <b><i>GLP1R</i></b>              | 5' ACATCAAATGCAGACTTGCCA 3' | 5' CCCAGCTCTTCCGAAATTCC 3'     |
| <b><i>UCP2</i></b>               | 5' TAAAGGTCCGATTCCAAGCTC 3' | 5' GGAGGTCATCTGTCATGAGG 3'     |
| <b><i>GJD2</i></b>               | 5' ATCGGGAGGATCCTGTTGAC 3'  | 5' GAGTAGGTGATGAAGCAAAGACTG 3' |
| <b><i>Cyclophilin (ppia)</i></b> | 5' AAGACTGAGTGGTTGGATGG 3'  | 5' ATGGTGATCTTCTTGCTGGT 3'     |

**Supplemental Table 2:** Primer sequences used for quantitative real-time polymerase chain reaction studies (qPCR).

## **SUPPLEMENTARY MOVIE LEGENDS**

**Supplemental Movie 1:** Timelapse recording of calcium responses to GLP-1 in a human islet. A fluo2-loaded islet was recorded at 0.5 Hz for 50 minutes using a 491 nm laser and Yokogawa Nipkow spinning disk head to rapidly scan a large optical section without introducing lag artefacts. 11 mM glucose was continuously perfused and 20 nM GLP-1 was applied for the indicated period. Playback rate 200 frames per second (fps). Movie has been cropped to display a single islet.

**Supplemental Movie 2:** Timelapse recording of GLP-1-stimulated insulin release in BGA-treated islets using the  $\text{Zn}^{2+}$ -probe ZIMIR. As for Supplemental Movie 1 but islets recorded at 0.1Hz for 40 minutes in the presence of BGA.

**Supplemental Movie 3:** Timelapse recording of GLP-1-stimulated insulin release in AGA-treated islets using the  $\text{Zn}^{2+}$ -probe ZIMIR. As for Supplemental Movie 2 but in the presence of AGA.

**Supplemental Movie 4:** Timelapse recording of calcium responses to glucose and GLP-1 in a normal diet mouse islet. As for Supplemental Movie 1 but playback 60 fps to demonstrate oscillatory behaviour. Movie has been cropped to display a single islet.

**Supplemental Movie 5:** Timelapse recording of calcium responses to glucose and GLP-1 in a high fat diet mouse islet. As for Supplemental Movie 1 but playback 60 fps to demonstrate oscillatory behaviour. Movie has been cropped to display a single islet.
